# Supplementary material for: A nonsense mutation of bone morphogenetic protein-15 (BMP15) causes both infertility and increased litter size in pigs
Source: PubMed Central journal article supplement (PMC7792226; doi:10.1186/s12864-020-07343-x), 2021-01-07
Supplement: 12864_2020_7343_MOESM3_ESM.pdf [file 12864_2020_7343_MOESM3_ESM.pdf]

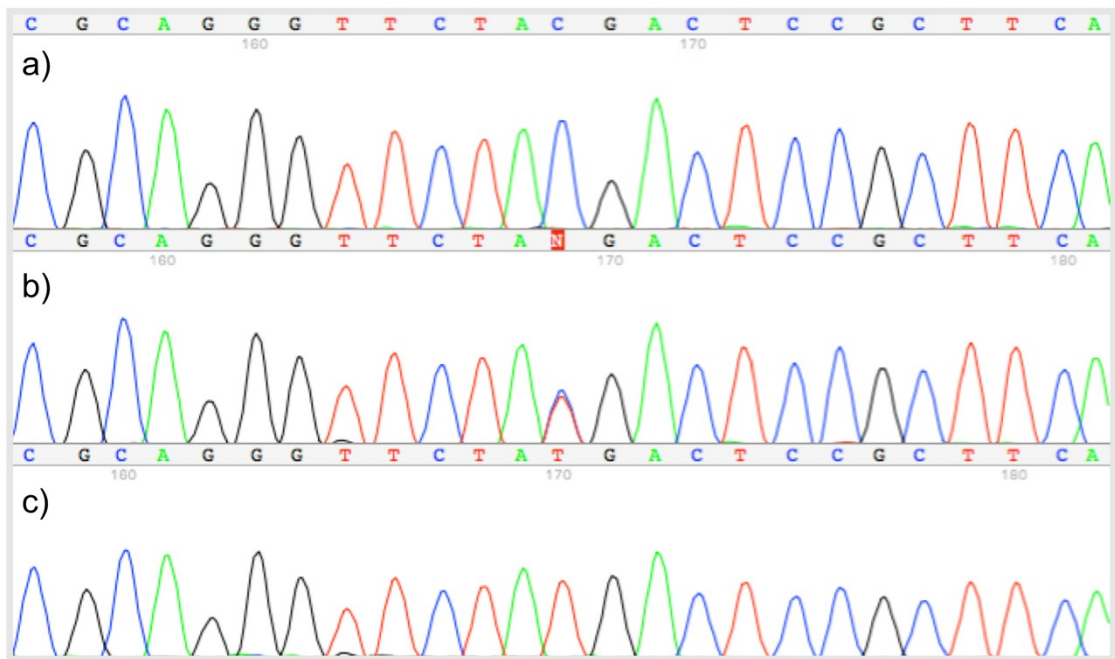

Chromatogram from Sanger-sequencing. a) homozygous for the wild type allele (C/C); b) heterozygous (C/T); c) homozygous for the mutant allele (T/T)
